# Supplementary material for: Influence of natural and anthropogenic aerosol on cloud base droplet size distributions in clouds over the South China Sea and Western Pacific
Source: Copernicus journal article supplement (doi:10.5194/egusphere-2022-1429), 2023-01-20
Supplement: Supplementary file [file egusphere-2022-1429-RC2-supplement.pdf]

Review of Miller et al.

L29. Add s to show. Insert that before three.

L31. Insert clean before marine.

L36-7. Move based on chemical signatures to the beginning of the sentence. Comma after emissions. Change The ship emissions to which.

L41. Delete sizes with. Insert clean before marine.

L77, 260 & 386. Three different symbols for droplet concentrations. Use only the last one,  $N_c$ .  $N_a$  should be reserved for drizzle drop concentrations, which you say will be the subject of your next paper.

L87. Delete on a. Delete basis. Add ly to constant.

L88. Add Durkee et al. (2000).

L98. Add Hudson et al. (2000).

L115. Aircrafts singular.

L116-119. Discussion of the Learjet is not needed.

L133. Add comma after fires.

L207. Remove also.

L223. Change in to is.

L228 and other lines. At least somewhere denote local time at least relative to UTC.

L253. Change daytime to daylight. Note local time.

L258-9. Move at 1 Hz resolution (Fig. 3B) before above. Insert and right before above.

Figure 5. I can see the median lines in some but not all. Not in BB ORG & SO<sub>4</sub> and Industrial SO<sub>4</sub>.

L302. Insert done after all.

L316. Delete and.

L318. Add n to Asia and then move Asian in front of origin followed immediately by mainland. Delete from.

L329. Concentration plural.

Figure 7. Can't see median line in BB NO<sub>3</sub>.

L428. Explain normalized.

Figure 11. Explain normalized. Is the ordinate  $dN/d\log D$ ? Or what is it? At least it must be per  $\text{cm}^3$

L448. Change in to of.

L461. Change microstructure to microphysics.

Appendix is difficult to follow.

L524. Define MMSI.

L535-6. Duration and of time are redundant.

L537. Is this going into port?

L540. Time progressed is redundant.

L541. Explain given its reported speed.

L545. Was reached seems unnecessary. Just say At 22:00 UTC.

L554. Change discretely to separately. The former sounds like a secret.

L556. In could be deleted.

L557. Explain geodesic.

Durkee, P.A., K.J. Noone, R.J. Ferek, D.W. Johnson, J.P. Taylor, T.J. Garrett, P.V. Hobbs, J.G. Hudson, C.S. Bretherton, G. Innis, G.M. Frick, W.A. Hoppel, C.D. O'Dowd, L.M. Russell, R. Gasparovic, K.E. Nielsen, S.A. Tessmer, E. Öström, S.R. Osborne, R.C. Flagan, J.H. Seinfeld, and H. Rand, 2000: The Impact of Ship-Produced Aerosols on the Microstructure and Albedo of Warm Marine Stratocumulus Clouds: A Test of MAST Hypotheses 1i and 1ii. *J. Atmos. Sci.*, **57**, 16, 2554–2569  
DOI: 10.1175/1520-0469(2000)057<2554:TIOSPA>2.0.CO;2

Hudson, J.G., T.J. Garrett, P.V. Hobbs, S.R. Strader, Y.X. Xie, and S.S. Yum, 2000: Cloud condensation nuclei and ship track clouds. *J. Atmos. Sci.*, **57**, 2696–2706.
